# Supplementary material
Source: PubMed Central journal article supplement (PMC7615390)
Supplement: EMS192720-supplement-Supplementary_Table.pdf [file EMS192720-supplement-Supplementary_Table.pdf]

**Supplementary table 1.** List of resources documenting xenobiotics likely to be ingested by humans.

| Ref. | Publisher / Database                                                                                                                                        | Compounds/ Content                         | Comment                                                                                    |
|------|-------------------------------------------------------------------------------------------------------------------------------------------------------------|--------------------------------------------|--------------------------------------------------------------------------------------------|
| 133  | EPA – PFAS Master List of PFAS Substances (Version2)                                                                                                        | Per- and polyfluoroalkyl substances (PFAs) | Synthetic industrial chemicals. Also used in food production.                              |
| 72   | EFSA – The 2018 European Union report on pesticide residues in food                                                                                         | Pesticides                                 | Pesticides used for crop production.                                                       |
| 73   | FDA – Pesticide Residue Monitoring Program                                                                                                                  |                                            |                                                                                            |
| 134  | EPA – Pesticides EPA: List of Active Ingredients                                                                                                            |                                            |                                                                                            |
| 135  | EFSA – Scientific Opinion on Mineral Oil Hydrocarbons in Food                                                                                               | Mineral Oil Hydrocarbons (MOHs)            | Derived from crude oil and used in industry and food production.                           |
| 136  | EFSA – Results of the monitoring of dioxin levels in food and feed                                                                                          | Dioxins & Polychlorinated biphenyls (PCBs) | Persistent pollutants that can accumulate in the food chain.                               |
| 137  | EFSA – Results of the monitoring of non dioxin-like PCBs in food and feed                                                                                   |                                            |                                                                                            |
| 138  | EPA – List: Dioxins and dioxin-like compounds                                                                                                               |                                            |                                                                                            |
| 79   | Critical review of major sources of human exposure to N-nitrosamines                                                                                        | Nitrosamines                               | Main exposure via smoking.                                                                 |
| 139  | EFSA – Metals as contaminants in foods                                                                                                                      | Heavy metals                               | Environmental contaminant.                                                                 |
| 140  | FCCdb: Food Contact Chemicals database Version 5.0                                                                                                          | Food contact materials                     | Several databases listing chemicals from food contact materials that may be found in food. |
| 141  | CPPdb: Plastic packaging-associated chemicals                                                                                                               |                                            |                                                                                            |
| 142  | EPA – List: Azo Dyes                                                                                                                                        |                                            |                                                                                            |
| 143  | EPA – Norman List: Bisphenol Compounds                                                                                                                      |                                            |                                                                                            |
| 144  | ELSIE – Extractables and Leachables                                                                                                                         |                                            |                                                                                            |
| 145  | FDA – Drugs@FDA Database                                                                                                                                    | Active drug ingredients                    |                                                                                            |
| 146  | FDA – Inactive Ingredient Database                                                                                                                          | Inactive drug ingredients                  |                                                                                            |
| 147  | Toxic Plants – Phytotoxin (TPPT) Database                                                                                                                   | Plant Toxins                               | Poisonous plants and their phytotoxins.                                                    |
| 148  | EPA – List: Mycotoxins                                                                                                                                      | Mycotoxins                                 | Toxic fungal metabolites found in food.                                                    |
| 149  | Food Standard Agency – Approved food additives in the UK                                                                                                    | Food additives                             | Compounds added to food for a purpose.                                                     |
| 90   | EFSA – Report for 2018 on the results from the monitoring of veterinary medicinal product residues and other substances in live animals and animal products | Veterinary medicinal products              | Veterinary drugs can be found in animal products.                                          |
| 150  | EPA – Pharmaceuticals Wikilist: Veterinary drugs                                                                                                            |                                            |                                                                                            |
| 151  | EPA – Category: Polycyclic Aromatic Hydrocarbons (PAHs)                                                                                                     | Polycyclic aromatic hydrocarbons (PAHs)    | Processing contaminants.                                                                   |
| 152  | NIH – Commonly Used Drugs                                                                                                                                   | Illegal substances                         | Common illegal substances consumed.                                                        |
| 127  | MASI – Microbiota-Active Substance Interactions database                                                                                                    | Gut bacteria & active substances           | Information about the microbiota alteration of various substances, substance alteration    |

|     |                                  |                                                    |                                                                                                     |
|-----|----------------------------------|----------------------------------------------------|-----------------------------------------------------------------------------------------------------|
|     |                                  |                                                    | of microbiota, and the abundance of gut bacteria in humans                                          |
| 153 | FAOSTAT – Fertilizers by Product | Fertilizers                                        | Fertilizer use worldwide.                                                                           |
| 154 | WHO – Exposome Explorer          | Biomarkers                                         | Biomarkers of exposure to environmental risk factors (dietary factors, pollutants, contaminants).   |
| 155 | HMBD – Human Metabolome Database | Small molecule metabolites found in the human body | Links chemical data, clinical data, and molecular biology/biochemistry data                         |
| 60  | FooDB Version 1.0                | Food constituents, chemistry and biology.          | Information on macro- and micronutrients, compositional, biochemical and physiological information. |
